# Supplementary material for: Revisiting chromatin binding of the Arabidopsis UV-B photoreceptor UVR8
Source: PubMed Central journal article supplement (PMC4750278; doi:10.1186/s12870-016-0732-5), 2016-02-11
Supplement: 12870_2016_732_MOESM2_ESM.pdf [file 12870_2016_732_MOESM2_ESM.pdf]

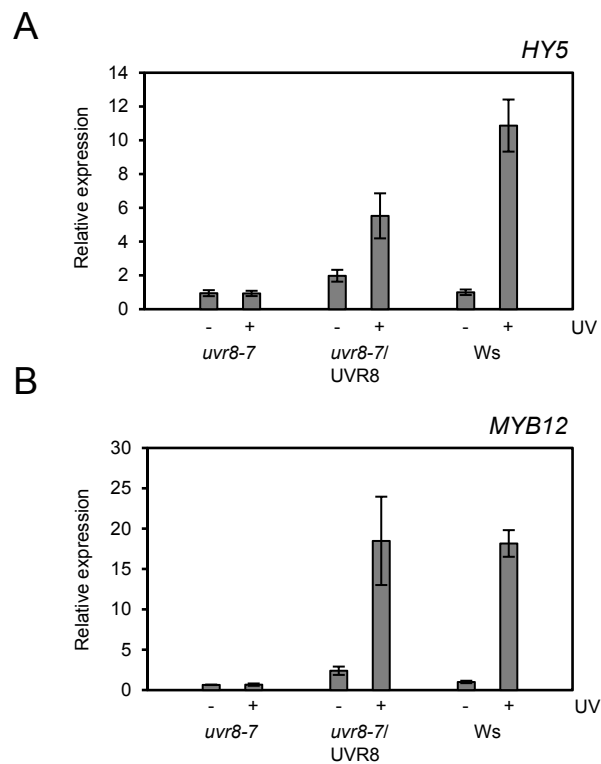

**Additional file 2.** UVR8 is functional as a UV-B photoreceptor in Arabidopsis protoplasts. **a, b** *uvr8-7* mutant and Ws wild-type protoplasts were transfected with sGFP(S65T) alongside *uvr8-7* mutant protoplasts transfected with *Pro<sub>35S</sub>:UVR8 (uvr8-7/UVR8)*. Gene expression was analysed 19–24 h post-transfection with protoplasts maintained under weak white light (-) or weak white light plus a final 3 h UV-B irradiation (+). Relative gene expression of *HY5* (**a**) and *MYB12* (**b**) are shown; wild type (Ws) transfected protoplasts in white light without UV-B (i.e. - UV) were set = 1. Data are shown as the means of five biological replicates ± standard errors.
