# Supplementary material for: Revisiting chromatin binding of the Arabidopsis UV-B photoreceptor UVR8
Source: PubMed Central journal article supplement (PMC4750278; doi:10.1186/s12870-016-0732-5), 2016-02-11
Supplement: 12870_2016_732_MOESM3_ESM.pdf [file 12870_2016_732_MOESM3_ESM.pdf]

**A**

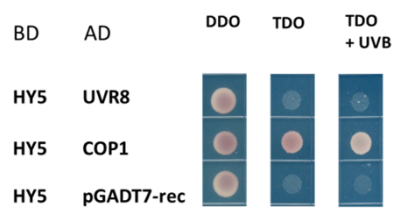

**B**

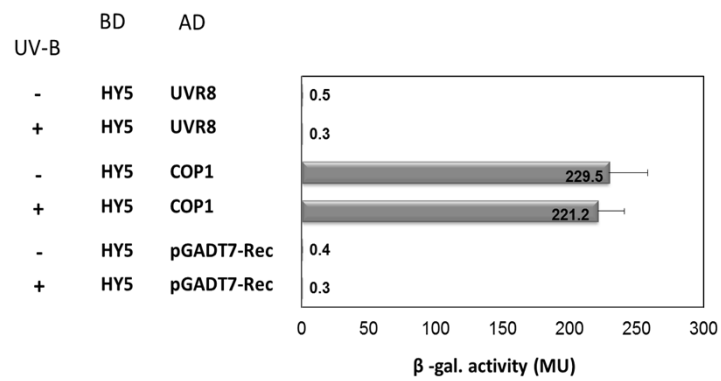

**Additional file 3.** UVR8 and HYS do not interact in yeast. **a, b** Yeast two-hybrid interaction of UVR8 and HYS in yeast growth assays (**a**) and quantitative lacZ assays (**b**) under white light (- UV-B) or supplemental UV-B (+ UV-B). HYS-COP1 interaction is shown as a positive control. Yeast growth medium DDO: SD/-Trp/-Leu; TDO: SD/-Trp/-Leu/-His. BD: LexA DNA-binding domain; AD: GAL4 activation domain.
