# Supplementary material for: Revisiting chromatin binding of the Arabidopsis UV-B photoreceptor UVR8
Source: PubMed Central journal article supplement (PMC4750278; doi:10.1186/s12870-016-0732-5), 2016-02-11
Supplement: 12870_2016_732_MOESM4_ESM.pdf [file 12870_2016_732_MOESM4_ESM.pdf]

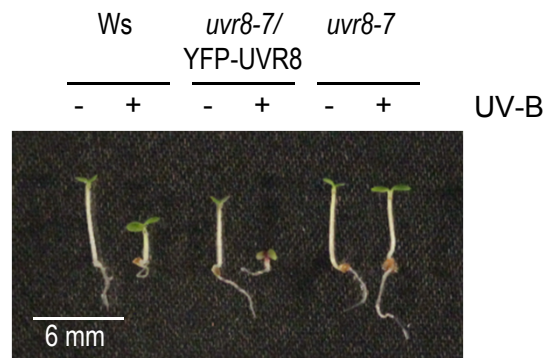

**Additional file 4.** Overexpression of YFP-UVR8 restores UV-B photomorphogenesis. *uvr8-7* seedlings expressing a Pro<sub>35S</sub>:YFP-UVR8 construct in Ws background, wild type (Ws) and *uvr8-7* mutant seedlings were grown for 4 days under weak white light with or without supplementary UV-B. Images of representative seedlings are shown.
