# Supplementary material for: Revisiting chromatin binding of the Arabidopsis UV-B photoreceptor UVR8
Source: PubMed Central journal article supplement (PMC4750278; doi:10.1186/s12870-016-0732-5), 2016-02-11
Supplement: 12870_2016_732_MOESM5_ESM.pdf [file 12870_2016_732_MOESM5_ESM.pdf]

**Additional file 5.** Oligonucleotide sequences for the primer pairs used in ChIP-qPCR.

**ChIP-qPCR**

| *                                | accession number    | fw primer                      | rv primer                   |
|----------------------------------|---------------------|--------------------------------|-----------------------------|
| <i>Pto</i> <sub>MYB12_-302</sub> | At2G47460           | CGAGTCTCTCGACGGTGAATAA         | GCGCCACGTTGGTTTAGAA         |
| <i>HY5_-1567</i>                 | At5g11270           | GATGACAGCGAAGAAGATGAAAAGA      | ACGCCAGCTTTCAAATGC          |
| <i>Pto</i> <sub>HY5_-414</sub>   | At5g11260           | GGCCATGTGACAGAAATGAAAG         | AGGATCCAAAAGGCAATTGAG       |
| <i>HY5_-97</i>                   | At5g11260           | GCTCTTTTCCCTCTTTATCCTTTTTCAC   | TGTTCCCTGCATTTTTCTTACTCTTTG |
| <i>HY5_+487</i>                  | At5g11260           | GAAAAGAGAAACAAGCGGCTGAA        | CCCATCACGCAACCCTTATT        |
| <i>HY5_+1562</i>                 | At5g11260           | CGCCATGGATTTGTAAACGA           | CCCTACCCCTCTTTGTCCGATT      |
| <i>HY5_+1990</i>                 | At5g11260           | TTCTCCTTCTTTTACCACCTTCCATCT    | TGCGGAAGCTGGTAAAAGACA       |
| <i>intergenic</i>                | At4g26900/At4g26910 | TCTTATAGTTGATTTCCCTTTTGTGACAGT | GCTGAGAAAAGTGAACATACGTTGCT  |
| <i>ACTIN2</i>                    | At3g18780           | TGCTGGACGTGACCTTACTG           | TTCCATCTCCTGCTCGTAGTC       |

\* Where included numbers indicate the position of the 5' end of the amplicon relative to the translation start site (referred to as position +1).
